# Supplementary material for: Theoretical study of the catalytic hydrodeoxygenation of furan, methylfuran and benzofurane on MoS2
Source: Royal Society of Chemistry journal article supplement (doi:10.1039/d4ra03043e), 2024-01-01
Supplement: d4ra03043e1.pdf [file d4ra03043e1.pdf]

**Theoretical study of the catalytic hydrodeoxygenation of  
furan, methylfuran and benzofurane on MoS<sub>2</sub>: Electronic Supporting Information**

Wilfried G. Kanhounon<sup>\*, a</sup>, Saber Gueddida<sup>\*, b</sup>, Simplicie Koudjina<sup>a</sup>, Frédéric Richard<sup>d</sup>, Guy Y. S. Atohoun<sup>a</sup>, Jean-François Paul<sup>e</sup>, Sébastien Lebègue<sup>b</sup> and Michael Badawi<sup>\*, b, c</sup>

<sup>a</sup>*Laboratoire de Chimie Physique – Matériaux et Modélisation Moléculaire (LCP3M) / Unité de Chimie Théorique et de Modélisation Moléculaire (UCT2M), Université d'Abomey-Calavi, Cotonou Bénin.*

<sup>b</sup>*Université de Lorraine, Laboratoire de Physique et Chimie Théoriques, Vandoeuvre-lès-Nancy 54506, France.*

<sup>c</sup>*Université de Lorraine, CNRS, L2CM, F-57000 Metz, France*

<sup>d</sup>*Université de Poitiers, CNRS, Institut de Chimie des Milieux et Matériaux de Poitiers, UMR 7285, rue Michel Brunet, BP633, 86022 Poitiers, France.*

<sup>e</sup>*Unité de Catalyse et Chimie du Solide (UCCS), Université Lille, CNRS UMR8181, F-59650 Villeneuve d'Ascq Cedex, France.*

Corresponding authors:

Wilfried G. Kanhounon: [gbedode.kanhounon@uac.bj](mailto:gbedode.kanhounon@uac.bj)

Saber Gueddida: [saber.gueddida@univ-lorraine.fr](mailto:saber.gueddida@univ-lorraine.fr)

Michael Badawi: [michael.badawi@univ-lorraine.fr](mailto:michael.badawi@univ-lorraine.fr)

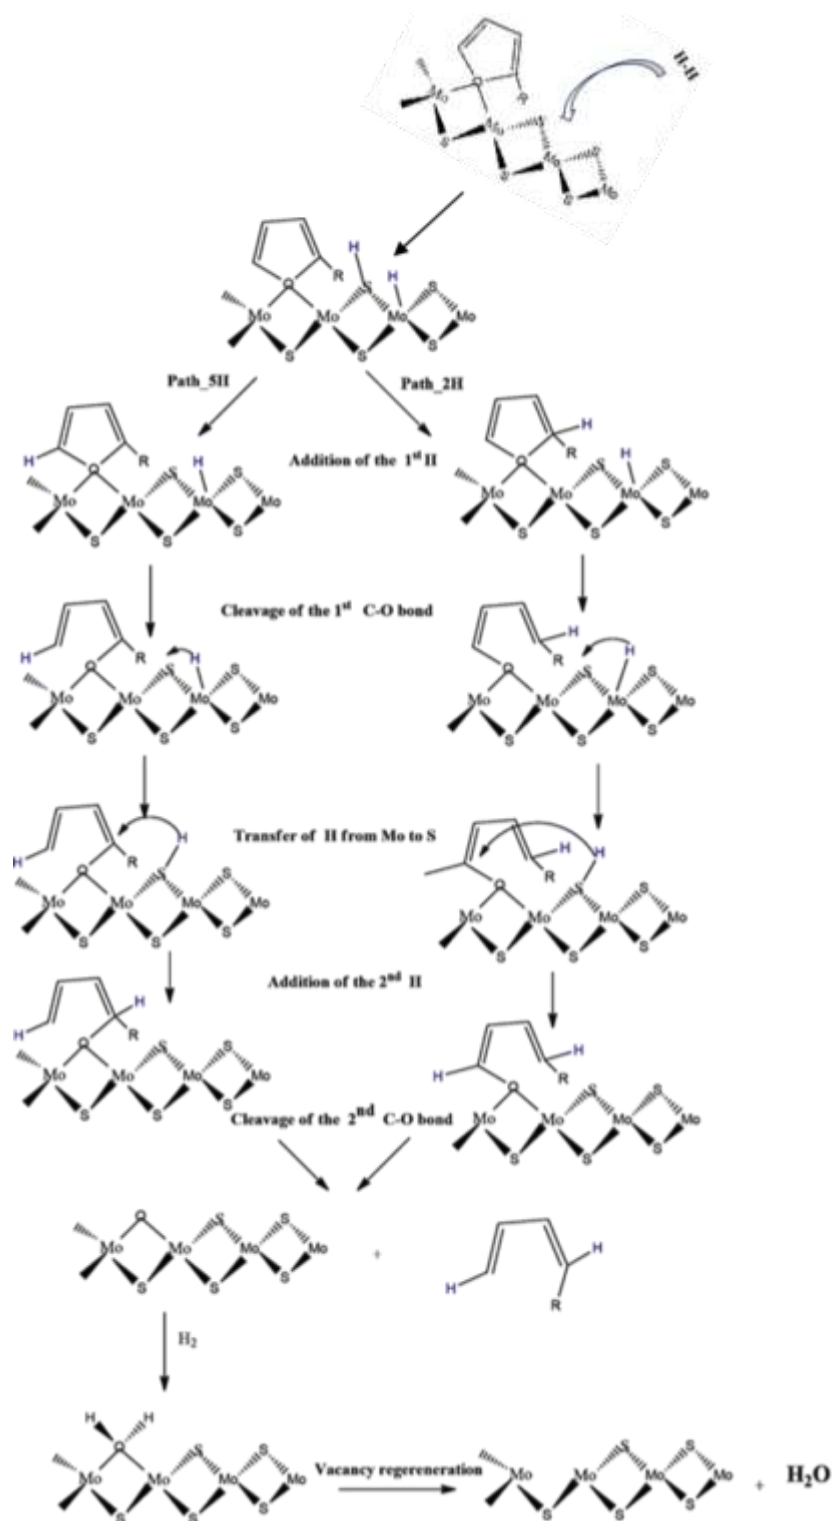

FIG. S1. Reaction scheme for the DDO mechanism of furan<sup>1</sup> and 2-methylfuran, R = H or -CH<sub>3</sub>, R = H corresponds to the case of furan where the two routes are equivalent.

<sup>1</sup> In this work, the DDO mechanism utilized is based on the well-established experimental and theoretical studies of the hydrodesulfurization mechanism of thiophene, with furan serving as its oxygen counterpart where the sulfur atom is substituted by an oxygen atom. (<https://doi.org/10.1016/j.cattod.2018.02.013>, <https://doi.org/10.1021/acs.jpcc.6b02769>).

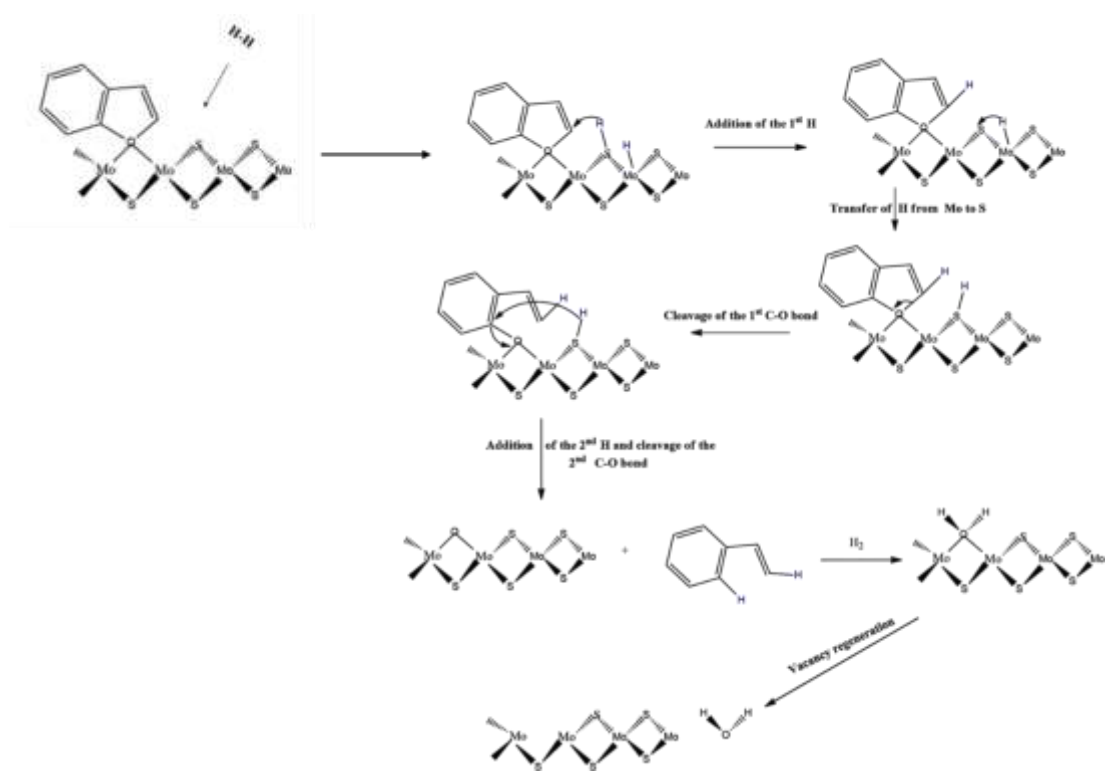

FIG. S2. Reaction scheme for the DDO mechanism of benzofuran.

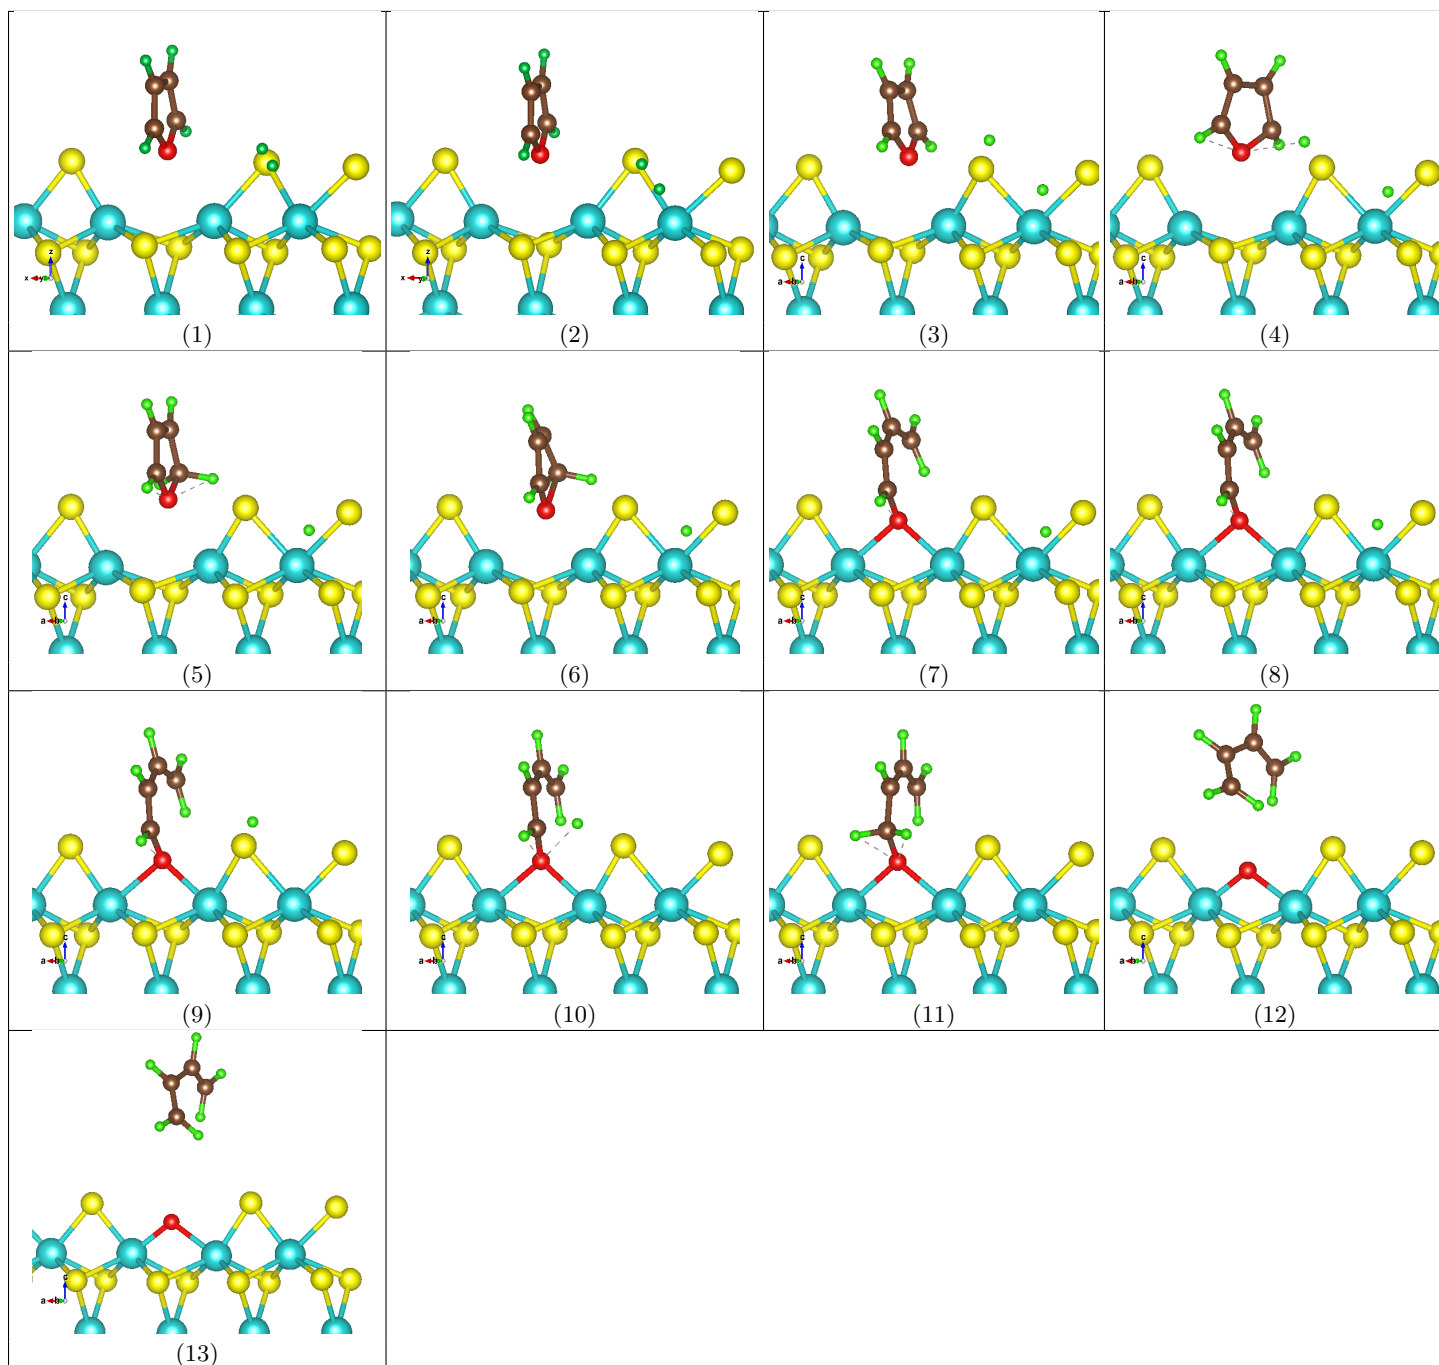

FIG. S3. Geometrical structures of the DDO route of furan on the metal edge of MoS<sub>2</sub> surface using the PBE+D2 approximation.

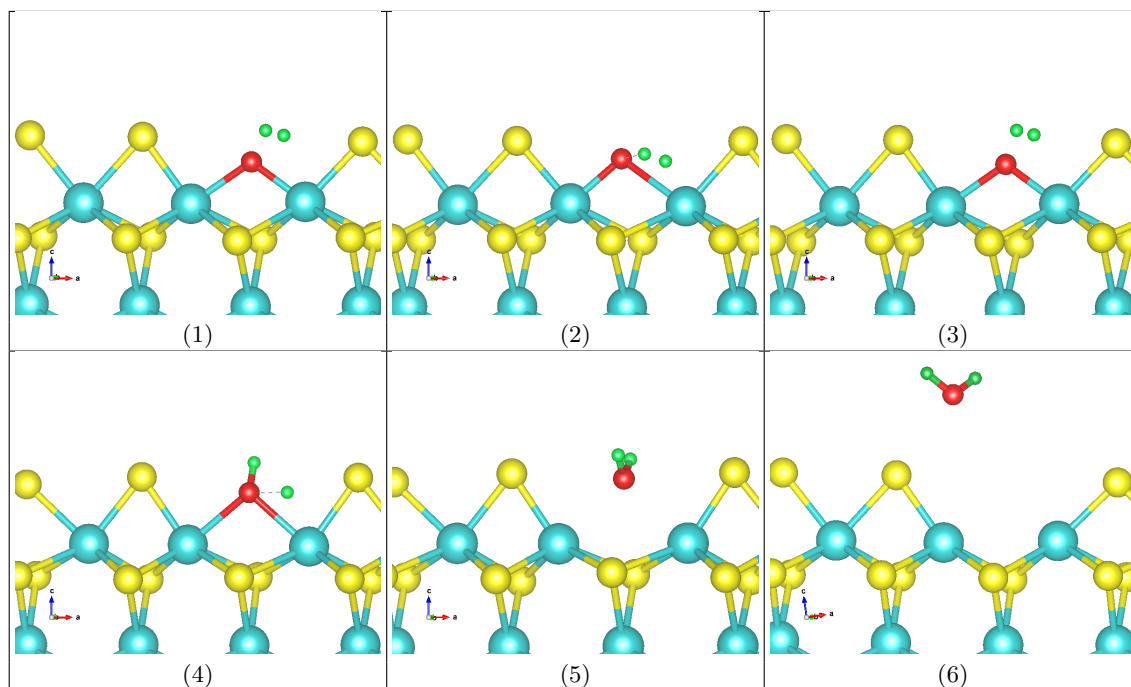

FIG. S4. Geometrical structures for vacancy regeneration on the metal edge of MoS<sub>2</sub> surface after oxygen atom removal from the studied molecules.

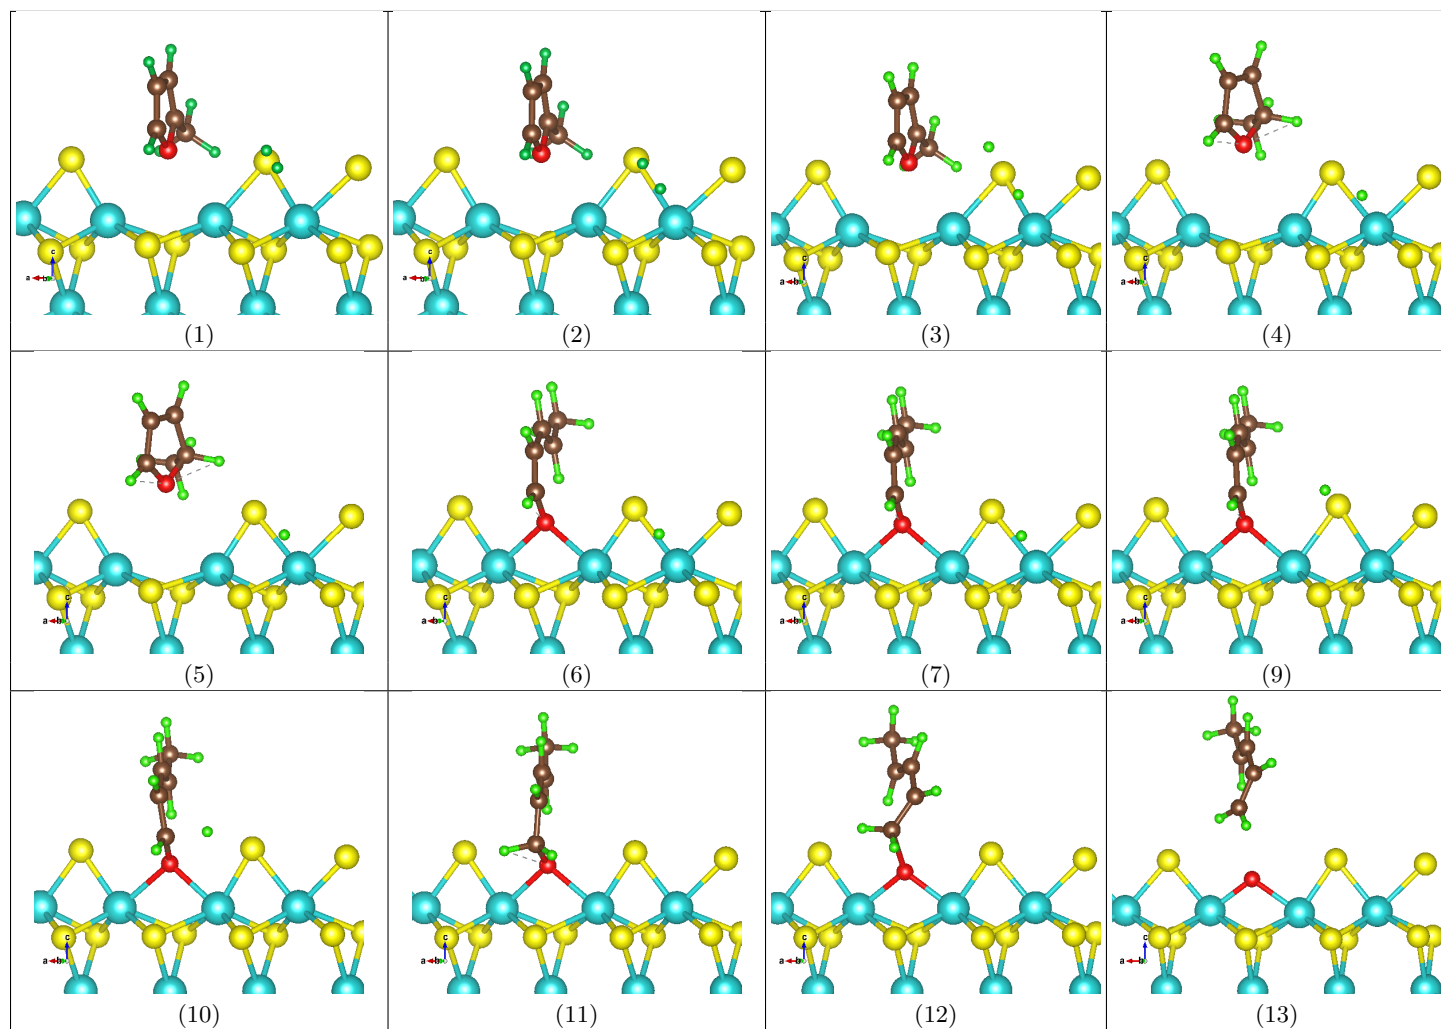

FIG. S5. Geometrical structures DDO (5H) route of the 2-methylfuran molecule on the metal edge of MoS<sub>2</sub> surface using the PBE+D2 approximation.

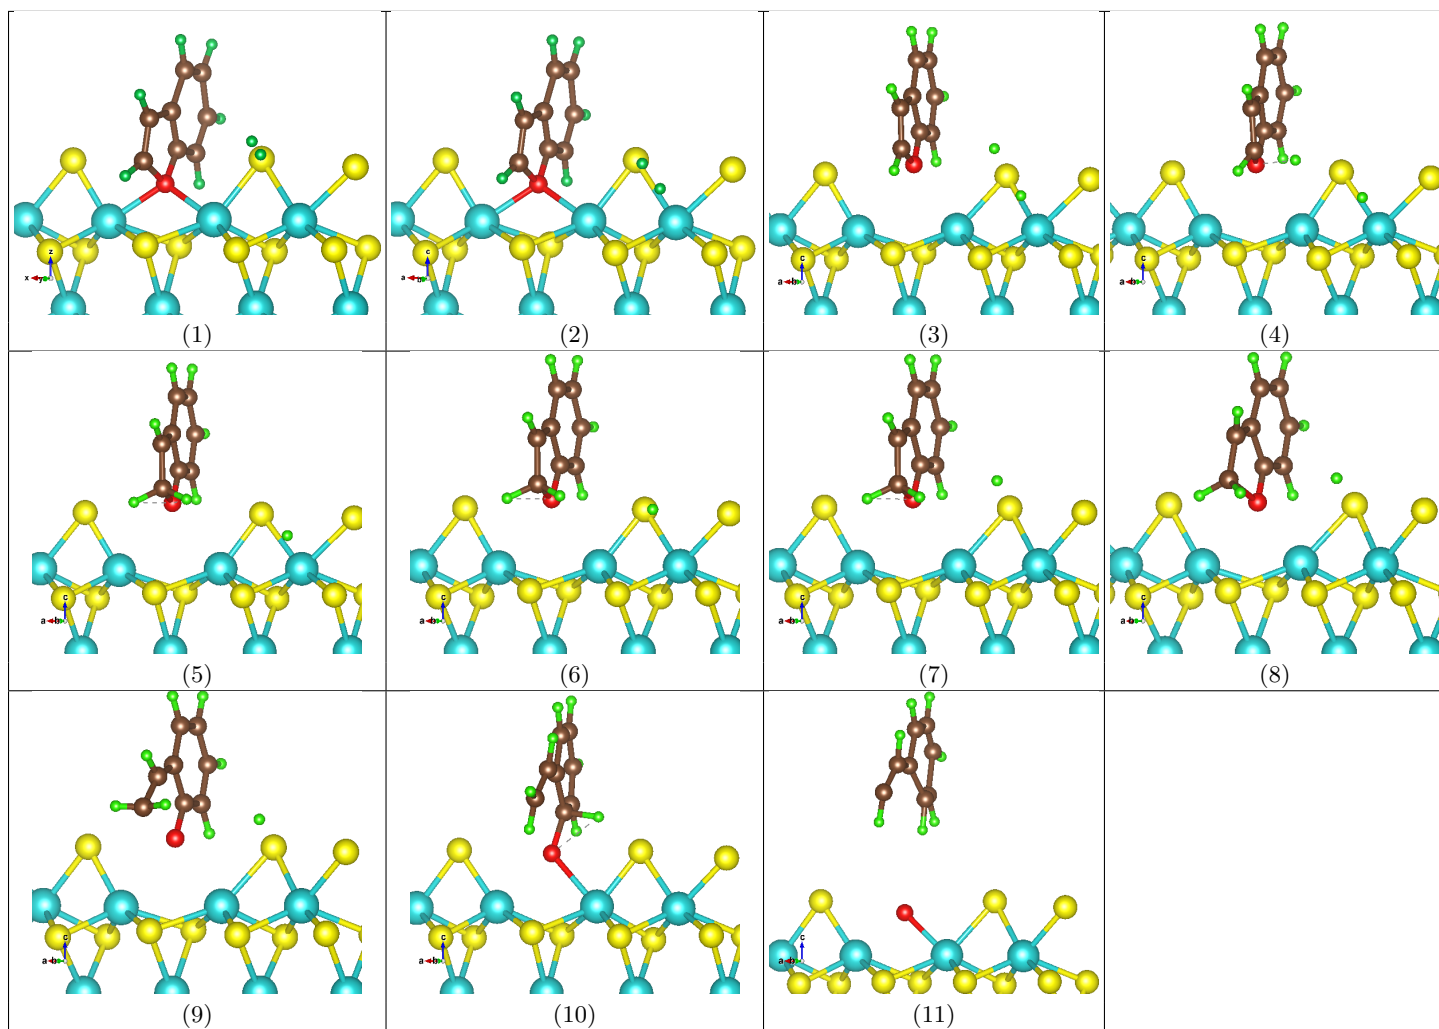

FIG. S6. Geometrical structures for DDO route of the benzofuran molecule on the metal edge of MoS<sub>2</sub> surface.
